## The Results of *CHD7* Analysis in Clinically Well-Characterized Patients with Kallmann Syndrome

Jorieke E. H. Bergman, Willem de Ronde, Marjolijn C. J. Jongmans, Bruce H. R. Wolffenbuttel, Sten L. S. Drop, Ad Hermus, Gianni Bocca, Lies H. Hoefsloot, and Conny M. A. van Ravenswaaij-Arts

Departments of Genetics (J.E.H.B., C.M.A.v.R.-A.), Endocrinology (B.H.R.W.), and Pediatric Endocrinology (G.B.), University of Groningen, University Medical Center Groningen, 9700 RB Groningen, The Netherlands; Department of Internal Medicine (W.d.R.), Kennemer Gasthuis, 2000 AK Haarlem, The Netherlands; Departments of Human Genetics (M.C.J.J., L.H.H.) and Endocrinology (A.H.), Radboud University Nijmegen Medical Center, 6525 GA Nijmegen, The Netherlands; and Department of Endocrinology (S.L.S.D.), Erasmus Medical Center, 3000 CA Rotterdam, The Netherlands

**Context:** Kallmann syndrome (KS) and CHARGE syndrome are rare heritable disorders in which anosmia and hypogonadotropic hypogonadism co-occur. KS is genetically heterogeneous, and there are at least eight genes involved in its pathogenesis, whereas CHARGE syndrome is caused by autosomal dominant mutations in only one gene, the *CHD7* gene. Two independent studies showed that *CHD7* mutations can also be found in a minority of KS patients.

**Objective:** We aimed to investigate whether *CHD7* mutations can give rise to isolated KS or whether additional features of CHARGE syndrome always occur.

**Design:** We performed *CHD7* analysis in a cohort of 36 clinically well-characterized Dutch patients with KS but without mutations in *KAL1* and with known status for the KS genes with incomplete penetrance, *FGFR1*, *PROK2*, *PROKR2*, and *FGF8*.

**Results:** We identified three heterozygous *CHD7* mutations. The *CHD7*-positive patients were carefully reexamined and were all found to have additional features of CHARGE syndrome.

**Conclusion:** The yield of *CHD7* analysis in patients with isolated KS seems very low but increases when additional CHARGE features are present. Therefore, we recommend performing *CHD7* analysis in KS patients who have at least two additional CHARGE features or semicircular canal anomalies. Identifying a *CHD7* mutation has important clinical implications for the surveillance and genetic counseling of patients. (*J Clin Endocrinol Metab* 97: E858–E862, 2012)

Kallmann syndrome (KS) is characterized by the combination of anosmia and hypogonadotropic hypogonadism (HH) (1). Anosmia, or the inability to smell, is the result of olfactory bulb defects (2), whereas HH presents as absent or impaired pubertal maturation and is caused by GnRH deficiency (3). KS is clinically and genetically very heterogeneous (Supplemental Table 1, published on The Endocrine Society's Journals Online web site at <http://jcem.endojournals.org>) (3–10). At present, mutations in eight genes explain approximately 25–35% of

KS cases. Heterozygous loss-of-function mutations in the *CHD7* gene were identified in patients with normosmic idiopathic HH (nIHH), KS, and CHARGE syndrome (11, 12).

CHARGE syndrome is a highly variable disorder in which congenital anomalies, multisensory impairment, and variable mental retardation can occur (OMIM 214800). CHARGE is an acronym for ocular coloboma, heart defects, choanal atresia, retardation of growth and/or development, genital hypoplasia and ear anomalies combined with deafness (13). HH and anosmia are present

in the majority of patients with CHARGE syndrome (14). Recently, we showed that HH and anosmia co-occur in CHARGE syndrome (4), which means that KS is part of the phenotypic spectrum of CHARGE syndrome. *CHD7* mutations are found in more than 90% of patients with typical CHARGE syndrome (5).

Conversely, *CHD7* mutations are not a major cause of KS, because only 3–5% of patients with nIHH/KS were found to have a *CHD7* mutation in two independent studies (11, 12). The first study identified seven *CHD7* mutations in a cohort of 197 patients with nIHH/KS (seven of 197 = 3.6%) (12). Four of the *CHD7*-positive patients had nIHH, whereas three patients had KS. In the *CHD7*-positive patients, no other features of CHARGE syndrome were present, except for cleft lip/palate and hearing loss, which can occur in both CHARGE syndrome and KS. The authors concluded that *CHD7* mutations can give rise to isolated nIHH and KS. The second study, performed by our group, found three *CHD7* mutations in a cohort of 56 Japanese/North American nIHH/KS patients in whom mutations in *KAL1*, *FGFR1*, *PROK2*, and *PROKR2* had been excluded (three of 56 = 5.4%) (11). The three *CHD7*-positive patients were all diagnosed with KS but on extensive clinical reevaluation were found to have several other features of CHARGE syndrome.

Because of the conflicting data from these two studies, we decided to investigate whether *CHD7* mutations can give rise to isolated KS in an independent cohort. We therefore analyzed the *CHD7* gene in 36 clinically well-characterized Dutch KS patients.

## Patients and Methods

### Patients

A cohort of 36 Dutch KS patients (seven women, 29 men), without a hemizygous mutation in *KAL1* in the male patients,

was informed about this study via their pediatric endocrinologist, endocrinologist, gynecologist, or clinical geneticist. The patients gave their informed consent for sequence analysis of *FGFR1*, *PROK2*, *PROKR2*, *FGF8*, and *CHD7* and for collection of their medical data via a questionnaire and/or retrospective chart review. The KS diagnosis was based on the presence of HH, defined as no pubertal maturation in combination with normal or low serum gonadotropins and low sex steroids, in combination with a smell deficit identified from the patient's history and/or formal smell testing. The *CHD7*-positive patients who were identified in this study, were carefully reevaluated for features of CHARGE syndrome and underwent formal smell testing [University of Pennsylvania Smell Identification Test (UPSIT); Sensonics Inc., Haddon Heights, NJ; www.sensonics.com) (15)]. This study was approved by the ethical review board of the University Medical Center Groningen (UMCG).

### DNA analysis

DNA was extracted from peripheral blood lymphocytes using standard procedures. All individual exons of the *CHD7* gene were amplified by PCR, and direct sequencing was performed on an ABI 3730 automated DNA sequencer (Applied Biosystems, Foster City, CA) as described previously (14). The GenBank accession number NM\_017780.2 was used as reference sequence for the *CHD7* gene. The A of ATG was designated number 1. The intron sequences of the *CHD7* gene can be found in NG\_007009.1.

## Results

The clinical features of the 36 Dutch KS patients and the results of DNA analysis are summarized in Table 1 and Supplemental Table 2. Heterozygous *CHD7* mutations were identified in three patients, who were carefully reexamined for additional features of CHARGE syndrome.

Patient 1 was diagnosed with KS at age 16 and received hormone replacement therapy (HRT). She had a bilateral cleft lip/palate and mixed hearing loss. At age 20, she was

**TABLE 1.** Dutch patients with KS who were found to have a mutation in the *CHD7* gene: *KAL1*, *FGFR1*, *PROK2*, *PROKR2*, and *FGF8* status, results of *CHD7* analysis, and an overview of the clinical characteristics and family history

| Patient no.<br>(n = 3) | Sex | <i>KAL1</i> , <i>FGFR1</i> , <i>PROK2</i> ,<br><i>PROKR2</i> , and <i>FGF8</i><br>status <sup>a</sup> | <i>CHD7</i> results                       | Clinical characteristics besides<br>hypogonadotropic<br>hypogonadism and anosmia                                                  | Family<br>history <sup>b</sup> |
|------------------------|-----|-------------------------------------------------------------------------------------------------------|-------------------------------------------|-----------------------------------------------------------------------------------------------------------------------------------|--------------------------------|
| 1                      | F   | —                                                                                                     | c.4015C>T; p.Arg1339X                     | Cleft lip and palate, bilateral mixed hearing loss, retinal coloboma, balance disturbance, mild scoliosis, olfactory bulb aplasia | —                              |
| 2                      | M   | —                                                                                                     | c.5316G>A; p.Trp1772X                     | Bilateral hearing loss, cleft palate, short stature, bicuspid aortic valve, abnormal external ears, synkinesia                    | —                              |
| 3                      | M   | —                                                                                                     | c.6322G>A; p.Gly2108Arg<br><i>de novo</i> | Bilateral sensorineural hearing loss, hypoplasia of cochlea and semicircular canals                                               | —                              |

F, Female; M, male.

<sup>a</sup> —, Normal results of *KAL1*, *FGFR1*, *PROK2*, *PROKR2*, and *FGF8* analysis.

<sup>b</sup> —, Negative family history.

reevaluated at the UMCG's multidisciplinary CHARGE outpatient clinic and was found to have a *CHD7* nonsense mutation (c.4015C>T; p.Arg1339X). Her history revealed delayed motor development and feeding difficulties. She also had balance disturbance [but a computed tomography (CT) scan of the temporal bone had not been performed], mild scoliosis, and impaired vision. Ophthalmological reexamination revealed bilateral retinal colobomas. Her external ears were normal, and ultrasound of the heart and kidneys showed no abnormalities. Anosmia was confirmed by formal smell testing (UPSIT score 12 of 40), and reevaluation of an earlier magnetic resonance imaging brain scan showed olfactory bulb aplasia. In retrospect, she has typical CHARGE syndrome.

Patient 2 was diagnosed with KS at age 16 and was started on HRT. He had severe bilateral hearing loss. He was reexamined at age 31 at the Department of Human Genetics, Radboud University Nijmegen Medical Center, and was shown to harbor a *CHD7* nonsense mutation (c.5316G>A; p.Trp1772X). His history revealed mildly delayed motor development and a cleft palate. He had short stature, synkinesia, and small earlobes. An ultrasound of heart and kidneys revealed a bicuspid aortic valve and normal kidneys. He has not undergone imaging of the inner ear. Formal smell testing showed that he had anosmia (UPSIT score 7 of 40). After reevaluation, he was found to have typical CHARGE syndrome.

Patient 3 was diagnosed with KS at age 14 and started with HRT. He had severe bilateral sensorineural hearing loss. He was reevaluated at age 17 at the UMCG's CHARGE outpatient clinic. *CHD7* analysis revealed a *de novo* *CHD7* missense mutation (c.6322G>A; p.Gly2108Arg). The glycine at position 2108 is highly conserved, and the amino acid substitution is considered pathogenic by three prediction programs (SIFT, PolyPhen, and Align GVGD) (16–18). In addition, this variant was previously identified in three other index patients with CHARGE syndrome and is therefore highly likely to be pathogenic ([www.CHD7.org](http://www.CHD7.org); Janssen, N., J. E. H. Bergman, M. A. Swertz, L. Tranebjaerg, M. Lodahl, J. Schoots, R. M. W. Hofstra, C. M. A. van Ravenswaaij-Arts, and L. H. Hoefsloot, submitted manuscript). Patient 3 had delayed motor development and balance disturbance. He has a normal intelligence and normal external ears, eyes, kidneys, and heart. Anosmia was confirmed with the UPSIT (score 9 of 40). A temporal bone CT scan showed hypoplasia of the cochlea and semicircular canals, a very specific and frequent feature in CHARGE syndrome, but otherwise, the patient did not fulfill the clinical criteria for CHARGE syndrome (5).

None of the patients with a *CHD7* mutation had an additional mutation in *FGFR1*, *PROK2*, *PROKR2*, or *FGF8*, whereas six other patients of our cohort harbored a heterozy-

gous missense variant in the *PROKR2* gene [c.254G>A; p.Arg85His (4x), c.254G>T; p.Arg85Leu, and c.791G>A; p.Arg264His], and one patient had a heterozygous variant in *FGF8* (c.86\_103dup; p.Gly29\_Arg34dup) (see Supplemental Table 2 and Information).

## Discussion

Our research question was whether *CHD7* mutations could be identified in KS patients without additional CHARGE features. We restricted our study to KS patients, because we have previously shown that HH is associated with anosmia in patients with a *CHD7* mutation (4), and therefore we assumed that the chance to find a *CHD7* mutation in normosmic IHH patients without CHARGE features would be even lower.

We identified three *CHD7* mutations in 36 Dutch KS patients (three of 36 = 8.3%). All three patients had additional features of CHARGE syndrome on careful reexamination, which is in agreement with our previous study (11). Hearing loss was the most frequent feature seen in the *CHD7*-positive KS patients in our study (Table 1) and in other published studies (11, 12); it was found in seven of 13 *CHD7*-positive KS patients. However, hearing loss can also occur in patients with a mutation in the *KAL1*, *FGFR1*, or *FGF8* gene (Supplemental Table 1) (7, 9). Other features that were repeatedly found in *CHD7*-positive KS patients were a cleft lip/palate (five of 13), short stature (three of 13), and balance disturbance (three of 13) (Table 1) (11, 12).

We did not identify a *CHD7* mutation in 30 KS patients without additional CHARGE features (Supplemental Table 2), which suggests that *CHD7* mutations are not a frequent cause of isolated KS. Recently, *CHD7* analysis was also performed in a cohort of 30 Finnish KS patients (19). Although three KS patients displayed additional CHARGE features, no *CHD7* mutations were identified in this cohort. Additional studies in large cohorts of clinically well-characterized KS patients are needed to estimate the frequency of *CHD7* mutations in KS patients more reliably. In addition, it would be useful to know whether the *CHD7*-positive patients in the study by Kim *et al.* (12) underwent formal smell testing and were carefully reevaluated after the *CHD7* mutation was identified, because otherwise subtle features of CHARGE syndrome could have been missed. Another limitation of the study by Kim *et al.* (12) is that it is unclear whether *CHD7* analysis was performed in the parents of the patients with a *CHD7* missense variant to give further proof that the five identified missense variants are indeed pathogenic.

Based on the results of this study and the literature, our advice is to evaluate KS patients carefully for features of CHARGE syndrome by taking a detailed case history and physical examination. If the case history reveals that walking without support was delayed, that the patient was unable to crawl without resting the head on the floor (5-point crawling), and that the patient was unable to ride a bicycle without side-stabilizers, the patient probably suffered from balance disturbance (20). Imaging of the semicircular canals (preferably a temporal bone CT scan) is indicated in all KS patients who are suspected of balance disturbance. Our advice is to perform *CHD7* analysis in KS patients who have at least two of the following features of CHARGE syndrome: ocular coloboma, choanal atresia/stenosis, characteristic external ear anomaly, cranial nerve dysfunction (facial palsy, sensorineural hearing loss, or hypoplastic cranial nerves on imaging), or balance disturbance. In addition, *CHD7* analysis is recommended in all KS patients with semicircular canal anomalies, irrespective of other CHARGE features. These recommendations are in line with our 2011 recommendation for *CHD7* analysis in patients suspected of CHARGE syndrome (5).

Identifying a *CHD7* mutation has important clinical implications. First, the *CHD7*-positive patient should be screened for additional CHARGE features, because subtle features can remain undetected but can have therapeutic consequences, *e.g.* unilateral renal agenesis. For recommendations on screening, we refer to the clinical surveillance schedule in Bergman *et al.* (5). Second, genetic counseling is indicated, because the patient has a 50% chance of transmitting the *CHD7* mutation to his or her offspring. The offspring may develop a more severe manifestation of CHARGE syndrome, because the syndrome is highly variable, even within families (5). The possibility of prenatal diagnosis and preimplantation genetic diagnosis should therefore be discussed.

## Acknowledgments

We thank the patients with KS for cooperating in this study. We also thank the following physicians for allowing us to include their KS patients in this study: H. L. Claahsen-van der Grinten, Department of Pediatric Endocrinology, and M. den Heijer and R. Netea-Maier, Department of Endocrinology, Radboud University Nijmegen Medical Center, Nijmegen, The Netherlands; A. Hoek, Department of Gynecology, University Medical Center Groningen, Groningen, The Netherlands; and Y. M. Hoedemaekers and M. E. H. Simon, Department of Genetics, Erasmus Medical Center, Rotterdam, The Netherlands. We thank Jackie Senior for editing the manuscript.

Address all correspondence and requests for reprints to: Conny M. A. van Ravenswaaij-Arts, Department of Genetics,

University Medical Center Groningen, P.O. Box 30.001, 9700 RB Groningen, The Netherlands. E-mail: c.m.a.van.ravenswaaij@umcg.nl.

This work was supported by The Netherlands Organization for Health Research and Development (ZonMW 92003460 to J.E.H.B.).

Disclosure Summary: J.E.H.B. was financially supported by the Netherlands Organization for Health Research and Development. The other authors have nothing to disclose.

## References

1. Kallmann FJ, Schoenfeld WA, Barrera SE 1944 The genetic aspects of primary eunuchoidism. *Am J Ment Def* 48:203–236
2. Yousem DM, Turner WJ, Li C, Snyder PJ, Doty RL 1993 Kallmann syndrome: MR evaluation of olfactory system. *Am J Neuroradiol* 14:839–843
3. Mitchell AL, Dwyer A, Pitteloud N, Quinton R 2011 Genetic basis and variable phenotypic expression of Kallmann syndrome: towards a unifying theory. *Trends Endocrinol Metab* 22:249–258
4. Bergman JE, Bocca G, Hoefsloot LH, Meiners LC, van Ravenswaaij-Arts CM 2011 Anosmia predicts hypogonadotropic hypogonadism in CHARGE syndrome. *J Pediatr* 158:474–479
5. Bergman JE, Janssen N, Hoefsloot LH, Jongmans MC, Hofstra RM, van Ravenswaaij-Arts CM 2011 *CHD7* mutations and CHARGE syndrome: the clinical implications of an expanding phenotype. *J Med Genet* 48:334–342
6. Dodé C, Teixeira L, Levilier J, Fouveaut C, Bouchard P, Kottler ML, Lespinasse J, Lienhardt-Roussie A, Mathieu M, Moerman A, Morgan G, Murat A, Toubanc JE, Wolczynski S, Delpech M, Petit C, Young J, Hardelin JP 2006 Kallmann syndrome: mutations in the genes encoding prokineticin-2 and prokineticin receptor-2. *PLoS Genet* 2:e175
7. Falardeau J, Chung WC, Beenken A, Raivio T, Plummer L, Sidis Y, Jacobson-Dickman EE, Eliseenkova AV, Ma J, Dwyer A, Quinton R, Na S, Hall JE, Huot C, Alois N, Pearce SH, Cole LW, Hughes V, Mohammadi M, Tsai P, Pitteloud N 2008 Decreased FGF8 signaling causes deficiency of gonadotropin-releasing hormone in humans and mice. *J Clin Invest* 118:2822–2831
8. Kim HG, Ahn JW, Kurth I, Ullmann R, Kim HT, Kulharya A, Ha KS, Itokawa Y, Melicani I, Wenzel W, Lee D, Rosenberger G, Ozata M, Bick DP, Sherins RJ, Nagase T, Tekin M, Kim SH, Kim CH, Ropers HH, Gusella JF, Kalscheuer V, Choi CY, Layman LC 2010 *WDR11*, a WD protein that interacts with transcription factor *EMX1*, is mutated in idiopathic hypogonadotropic hypogonadism and Kallmann syndrome. *Am J Hum Genet* 87:465–479
9. Tsai PS, Gill JC 2006 Mechanisms of disease: insights into X-linked and autosomal-dominant Kallmann syndrome. *Nat Clin Pract Endocrinol Metab* 2:160–171
10. Xu N, Kim HG, Bhagavath B, Cho SG, Lee JH, Ha K, Melicani I, Wenzel W, Podolsky RH, Chorich LP, Stackhouse KA, Grove AM, Odom LN, Ozata M, Bick DP, Sherins RJ, Kim SH, Cameron RS, Layman LC 2011 Nasal embryonic LHRH factor (*NELF*) mutations in patients with normosmic hypogonadotropic hypogonadism and Kallmann syndrome. *Fertil Steril* 95:1613–1620.e1–7
11. Jongmans MC, van Ravenswaaij-Arts CM, Pitteloud N, Ogata T, Sato N, Claahsen-van der Grinten HL, van der Donk K, Seminara S, Bergman JE, Brunner HG, Crowley Jr WF, Hoefsloot LH 2009 *CHD7* mutations in patients initially diagnosed with Kallmann syndrome: the clinical overlap with CHARGE syndrome. *Clin Genet* 75:65–71
12. Kim HG, Kurth I, Lan F, Melicani I, Wenzel W, Eom SH, Kang GB, Rosenberger G, Tekin M, Ozata M, Bick DP, Sherins RJ, Walker SL, Shi Y, Gusella JF, Layman LC 2008 Mutations in *CHD7*, encoding a chromatin-remodeling protein, cause idiopathic hypogonado-



- tropic hypogonadism and Kallmann syndrome. *Am J Hum Genet* 83:511–519
13. Pagon RA, Graham JM Jr, Zonana J, Yong SL 1981 Coloboma, congenital heart disease, and choanal atresia with multiple anomalies: CHARGE association. *J Pediatr* 99:223–227
  14. Jongmans MC, Admiraal RJ, van der Donk KP, Vissers LE, Baas AF, Kapusta L, van Hagen JM, Donnai D, de Ravel TJ, Veltman JA, Geurts van Kessel A, De Vries BB, Brunner HG, Hoefsloot LH, van Ravenswaaij CM 2006 CHARGE syndrome: the phenotypic spectrum of mutations in the CHD7 gene. *J Med Genet* 43:306–314
  15. Doty RL, Shaman P, Dann M 1984 Development of the University of Pennsylvania smell identification test: a standardized microencapsulated test of olfactory function. *Physiol Behav* 32:489–502
  16. Adzhubei IA, Schmidt S, Peshkin L, Ramensky VE, Gerasimova A, Bork P, Kondrashov AS, Sunyaev SR 2010 A method and server for predicting damaging missense mutations. *Nat Methods* 7:248–249
  17. Kumar P, Henikoff S, Ng PC 2009 Predicting the effects of coding non-synonymous variants on protein function using the SIFT algorithm. *Nat Protoc* 4:1073–1081
  18. Mathe E, Olivier M, Kato S, Ishioka C, Hainaut P, Tavtigian SV 2006 Computational approaches for predicting the biological effect of p53 missense mutations: a comparison of three sequence analysis based methods. *Nucleic Acids Res* 34:1317–1325
  19. Laitinen EM, Vaaralahti K, Tammiska J, Eklund E, Tervaniemi M, Valanne L, Raivio T 2011 Incidence, phenotypic features and molecular genetics of Kallmann syndrome in Finland. *Orphanet J Rare Dis* 6:41
  20. Abadie V, Wiener-Vacher S, Morisseau-Durand MP, Porée C, Amiel J, Amanou L, Peigné C, Lyonnet S, Manac'h Y 2000 Vestibular anomalies in CHARGE syndrome: investigations on and consequences for postural development. *Eur J Pediatr* 159:569–574.

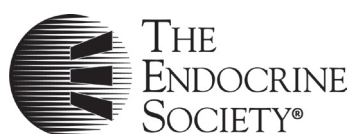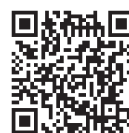

Challenge your diagnostic skills with a one-of-a-kind self-assessment resource, ***Diagnostic Dilemmas: Images in Endocrinology***, edited by Leonard Wartofsky, M.D.

[www.endo-society.org/dilemmas](http://www.endo-society.org/dilemmas)
